# Supplementary material
Source: publisher figshare collection journal article supplement (https://acs.figshare.com/ndownloader/files/4669618)
Supplement: Supplementary file 1 [file 4669618]

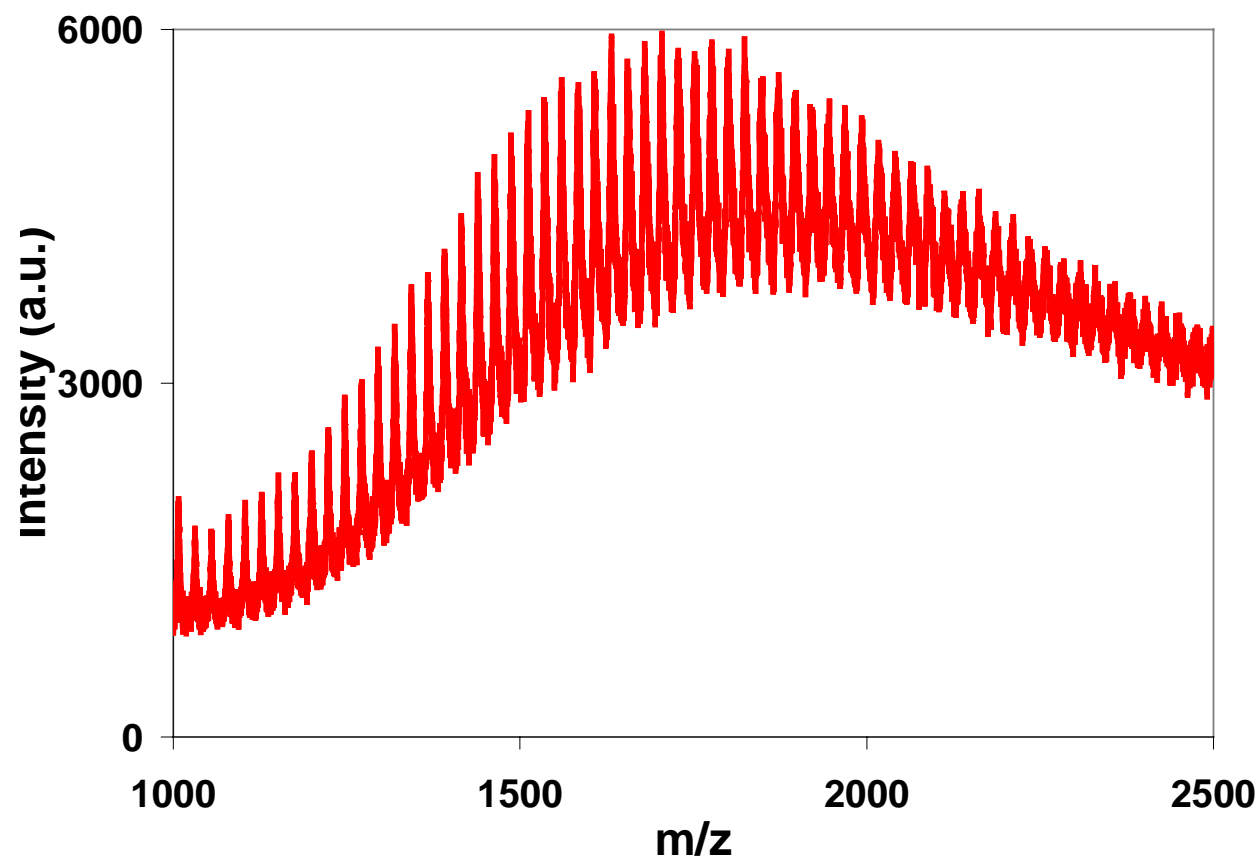

**Figure S1.** MALDI spectra of large fullerenes in the starting sample showing evenly separated masses at spacing of 24 amu arising from the spacing of C<sub>2</sub> species.

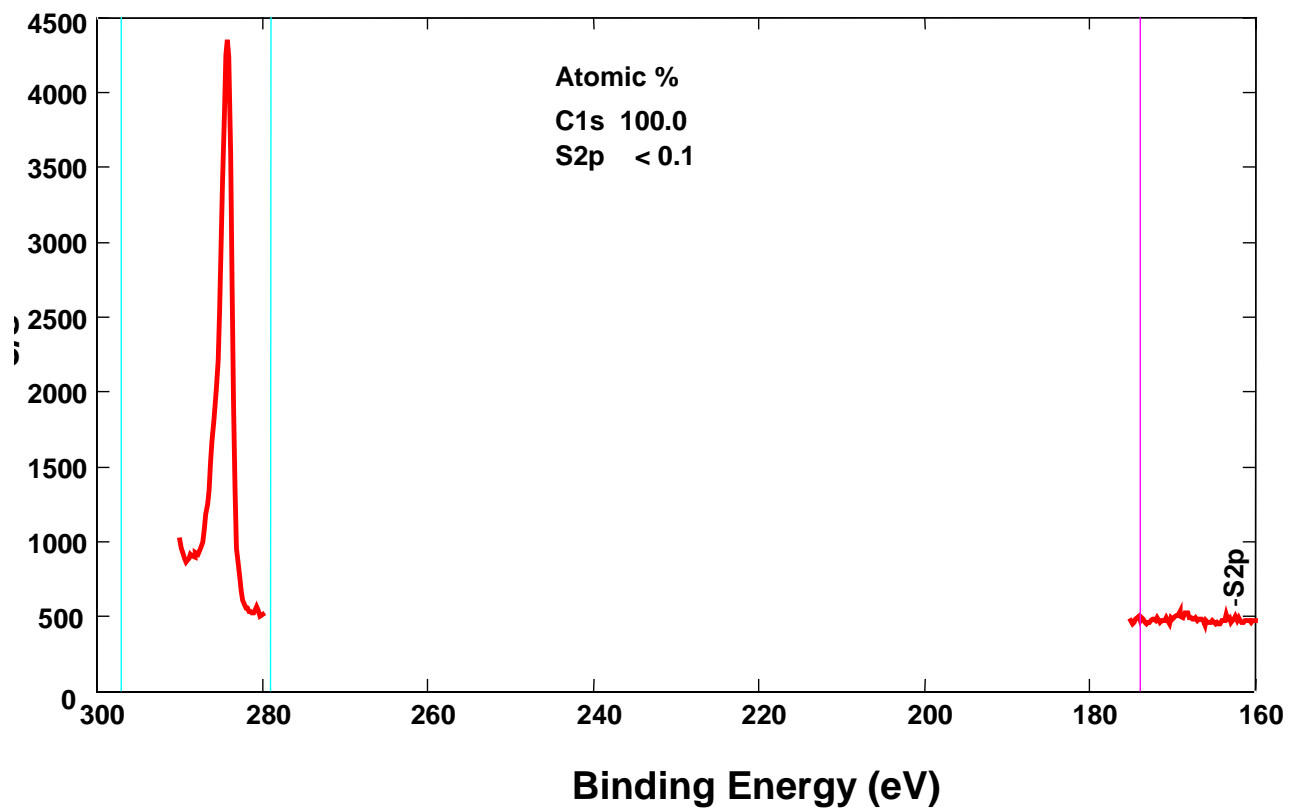

**Figure S2.** XPS spectra of large fullerenes dissolve in 96% sulfuric acid for two weeks and then quenched in ether and washed with methanol showing presence of only carbon atoms.
